# Supplementary material for: Combination of pre-adapted bacteriophage therapy and antibiotics for treatment of fracture-related infection due to pandrug-resistant Klebsiella pneumoniae
Source: PubMed Central journal article supplement (PMC8766457; doi:10.1038/s41467-021-27656-z), 2022-01-18
Supplement: 41467_2021_27656_MOESM2_ESM.pdf [file 41467_2021_27656_MOESM2_ESM.pdf]

### **Description of Additional Supplementary Files**

File Name: Supplementary Data 1

Description: Single nucleotide polymorphisms (SNPs) present in adapted phage M1.

File Name: Supplementary Data 2

Description: Genome islands and prophages present in the patient's *Klebsiella pneumoniae* strains.

File Name: Supplementary Data 3

Description: : Single nucleotide polymorphisms (SNPs) present in the patient's *Klebsiella pneumoniae* strains

File Name: Supplementary Data 4

Description: Annotation of antimicrobial resistance (AMR) genes present in the patient's *Klebsiella pneumoniae* strains.

File Name: Supplementary Data 5

Description: National Center for Biotechnology Information (NCBI) accession codes of phage and bacterial genome sequences
